# Supplementary material for: Lamprey VLRB response to influenza virus supports universal rules of immunogenicity and antigenicity
Source: eLife journal article supplement (doi:10.7554/elife.07467), 2015-08-07

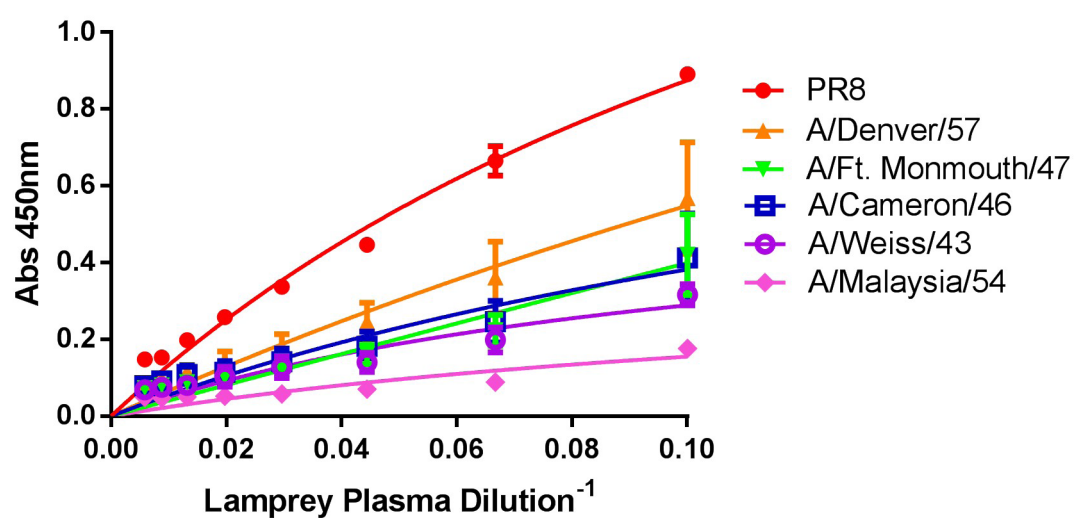

Supplement: supp [file elife_poa_e07467_Table_1_source_data_2.pdf › elife_poa_e07467_Table_1_source_data_2.pdf]
